# Supplementary material
Source: publisher site journal article supplement (https://www.degruyterbrill.com/publication/isbn/9783110259193/downloadAsset/9783110259193_Inhaltsverzeichnis.pdf)
Supplement: Supplementary file 1 [file 9783110259193_Inhaltsverzeichnis.pdf]

# Inhalt

|                                                                                                                                                                                                                                                                       |     |
|-----------------------------------------------------------------------------------------------------------------------------------------------------------------------------------------------------------------------------------------------------------------------|-----|
| Vorwort . . . . .                                                                                                                                                                                                                                                     | V   |
| <i>Historia</i> als Kultur – Einführung<br><i>Patrick Fiska – Ines Peper – Thomas Stockinger –<br/>Thomas Wallnig</i> . . . . .                                                                                                                                       | 1   |
| Terra sacra – terra sancta.<br>Territorium und Kirche in der oberdeutschen Historiographie<br>des 17. und 18. Jahrhunderts<br><i>Alois Schmid</i> . . . . .                                                                                                           | 21  |
| Katholische Historiographie im 17. Jahrhundert –<br>was war vor Pez?<br><i>Stefan Benz</i> . . . . .                                                                                                                                                                  | 43  |
| Amand Pachlers <i>Vita</i> des Hl. Vitalis (1663)<br>und die Wurzeln benediktinischer Geschichtsschreibung<br>im Umfeld der Salzburger Universität<br><i>Barbara Lawatsch Melton</i> . . . . .                                                                        | 75  |
| Erinnern als Kulturtechnik: Klosterarchive im Barock<br><i>Helga Penz</i> . . . . .                                                                                                                                                                                   | 91  |
| Vom <i>gesponß</i> , seiner <i>schönen braut</i><br>und dem Freisinger <i>neuen Jerusalem</i> .<br>Wie Fürstbischof Eckher, der Benediktiner Meichelbeck und die<br>Brüder Asam mit der Kunst der Überzeugung Geschichte darstellten<br><i>Uta Coburger</i> . . . . . | 107 |
| War Karl Meichelbeck ein „deutscher Mauriner“?<br><i>Thomas Stockinger</i> . . . . .                                                                                                                                                                                  | 135 |
| Die Deckenmalereien der Stiftskirche Melk<br>oder die Visualisierung von Ordensgeschichte<br>als Manifestation kirchenpolitischer Ansprüche<br><i>Werner Telesko</i> . . . . .                                                                                        | 169 |

## VIII Inhalt

|                                                                                                                                                                                                         |     |
|---------------------------------------------------------------------------------------------------------------------------------------------------------------------------------------------------------|-----|
| Ordensgeschichte als Kulturgeschichte?<br>Wissenschaftshistorische Überlegungen zur Historizität in der<br>benediktinischen Geschichtsforschung des 18. Jahrhunderts<br><i>Thomas Wallnig</i> . . . . . | 193 |
| Ecclesia als Objekt der Historiographie.<br>Ekklesiologie, theologische Erkenntnis und Historiographie<br>bei römischen Kirchenhistorikern im 18. Jahrhundert<br><i>Bernward Schmidt</i> . . . . .      | 213 |
| „Les meilleures causes embarrassent les juges, si elles manquent de<br>bonnes preuves“:<br>Père Norbert's Militant Historiography on the Malabar Rites<br>Controversy<br><i>Paolo Aranha</i> . . . . .  | 239 |
| Il misterioso Filippi.<br>Gottfried Philipp Spannagel zwischen den italienischen Staaten<br>und der Habsburgermonarchie<br><i>Elisabeth Garms-Cornides – Fabio Marri</i> . . . . .                      | 271 |
| Cluny and Benedictine Erudition in Early Modern France.<br>Political Issues and Monastic Reform<br><i>Daniel-Odon Hurel</i> . . . . .                                                                   | 305 |
| Histoires de la grâce.<br>„Semi-pélagiens“ et „prédestinés“ dans l'érudition ecclésiastique<br>du XVII <sup>e</sup> siècle<br><i>Jean-Louis Quantin</i> . . . . .                                       | 327 |
| Peiresc and the Benedictines of Saint-Maur.<br>Further Thoughts on the „Ethics of the Historian“<br><i>Peter N. Miller</i> . . . . .                                                                    | 361 |
| (Heiligen-)Geschichte als Streitfall.<br>Die <i>Acta sanctorum</i> und Mabillons <i>Epistola de cultu sanctorum<br/>ignotorum</i> und die römische Zensur<br><i>Andreea Badea</i> . . . . .             | 379 |

|                                                                                                                                                                                    |     |
|------------------------------------------------------------------------------------------------------------------------------------------------------------------------------------|-----|
| Vom Ding zum Denkmal.<br>Überlegungen zur Entfaltung des frühneuzeitlichen<br>Antiquarianismus<br><i>Jan Marco Sawilla</i> . . . . .                                               | 405 |
| „Ausweitung der Diskurszone“ um 1700.<br>Der Angriff des Barthélémy Germon<br>auf die Diplomatie Jean Mabillons<br><i>Mark Mersiowsky</i> . . . . .                                | 447 |
| Im Vorfeld des Spanischen Erbfolgekrieges:<br>Leibniz bringt seine historischen Kollektaneen zum Einsatz<br><i>Nora Gädeke</i> . . . . .                                           | 485 |
| Der „Unglaube entstellt den Ruhm“.<br>Ezechiel Spanheim kommentiert Julian Apostata (ca. 1660–1696)<br><i>Sven Externbrink</i> . . . . .                                           | 513 |
| Ursprünge und Anfänge, immer wieder.<br>Zu unterschiedlichen Formen der Historizität in der deutschen<br>Rechtsgeschichte des 18. Jahrhunderts<br><i>Colin F. Wilder</i> . . . . . | 533 |
| Der Normannenstreit als Gründungsschlacht<br>der russischen Geschichtsschreibung.<br>Zur Poetik wissenschaftlicher Anfangserzählungen<br><i>Konstantin Kaminskij</i> . . . . .     | 553 |
| Epilogue<br><i>Anthony Grafton</i> . . . . .                                                                                                                                       | 583 |
| Abbildungsverzeichnis . . . . .                                                                                                                                                    | 591 |
| Register . . . . .                                                                                                                                                                 | 597 |
| Abbildungen . . . . .                                                                                                                                                              | 619 |
